# Supplementary material for: A Novel One-Dimensional Porphyrin-Based Covalent Organic Framework
Source: MDPI journal article supplement (doi:10.3390/molecules24183361), 2019-09-16
Supplement: s1 [file s1]

## Supporting Information

### A Novel One-dimensional Porphyrin-based Covalent Organic Framework

Miao Zhang <sup>1,2</sup>, Ruijin Zheng,<sup>1,2</sup> Ying Ma,<sup>3</sup> Ruiping Chen,<sup>4</sup> Xun Sun,<sup>1,2\*</sup> Xuan Sun<sup>3\*</sup>

<sup>1</sup>State Key Laboratory of Crystal Materials, Shandong University, Jinan 250100, P. R. China. E-mail: sunxun@sdu.edu.cn

<sup>2</sup>Key Laboratory of Functional Crystal Materials and Device (Shandong University), Ministry of Education, Jinan 250100, China.

<sup>3</sup>Key Laboratory of Colloid and Interface Chemistry, Shandong University, Ministry of Education, Jinan 250100, P. R. China. E-mail: sunxuan@sdu.edu.cn

<sup>4</sup>State Key Laboratory of Structural Chemistry Fujian Institute of Research on the Structure of Matter, Chinese Academy of Sciences Fuzhou, 350002, P. R. China

# Contents

|                                                           |    |
|-----------------------------------------------------------|----|
| Section S1 FE-SEM analysis .....                          | 3  |
| Section S2 TEM analysis .....                             | 3  |
| Section S3 Thermogravimetric analysis .....               | 4  |
| Section S4 PXRD Pattern of COF-K and building units ..... | 4  |
| Section S5 Simulation of two-dimensional structures ..... | 5  |
| Section S6 CO <sub>2</sub> adsorption measurement .....   | 6  |
| Section S7 Unit cell parameters .....                     | 7  |
| Section S8 NMR spectra .....                              | 10 |

## Section S1 FE-SEM analysis

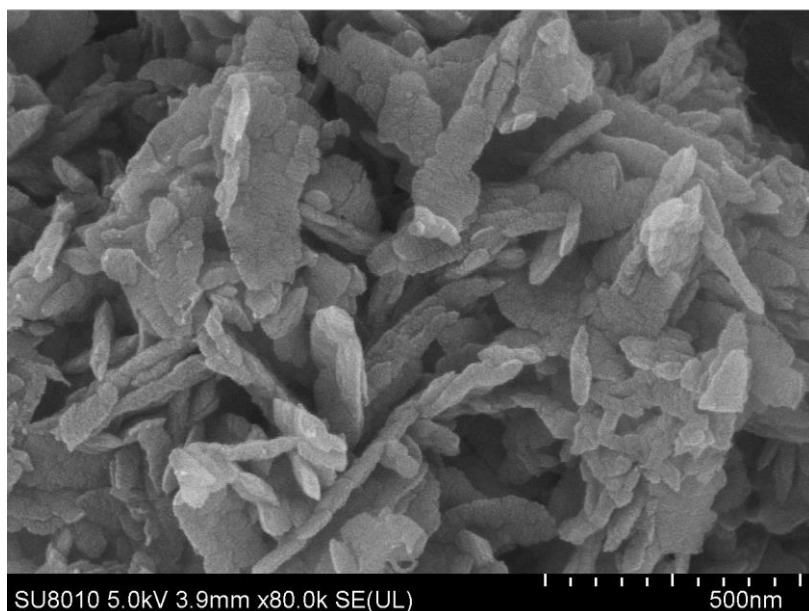

Figure S1. SEM image of COF-K

## Section S2 TEM analysis

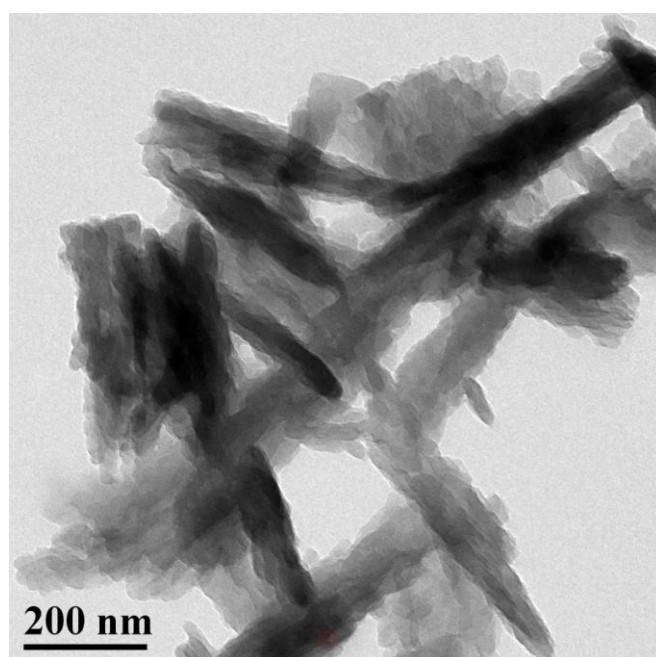

Figure S2. TEM image of COF-K

## Section S3 Thermogravimetric analysis

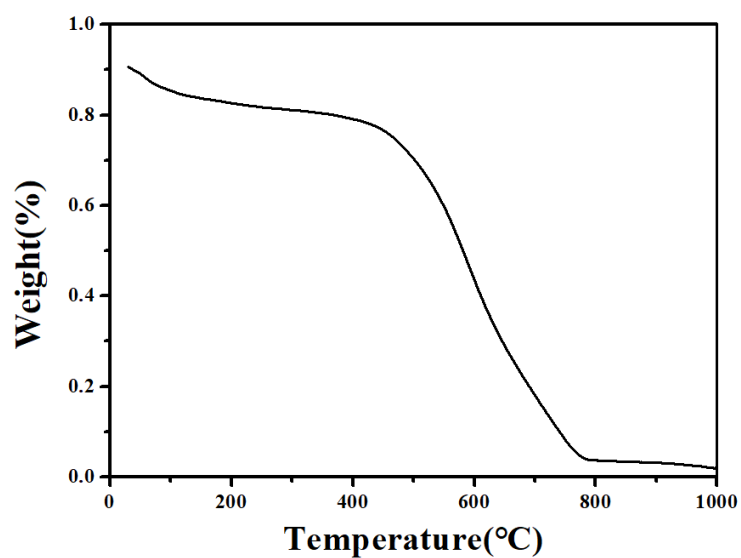

Figure S3. TGA profile of COF-K

## Section S4 PXRD Pattern of COF-K and building units

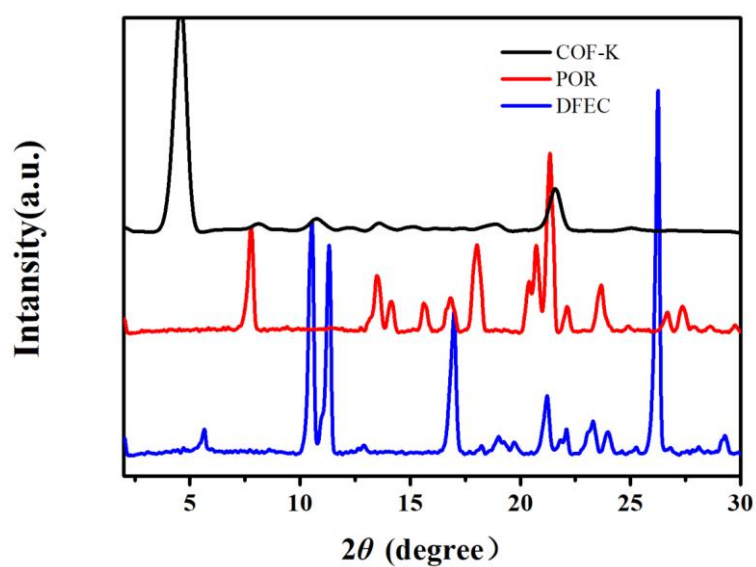

Figure S4. XRD pattern of COF-K and building units.

## Section S5 Simulation of two-dimensional structures

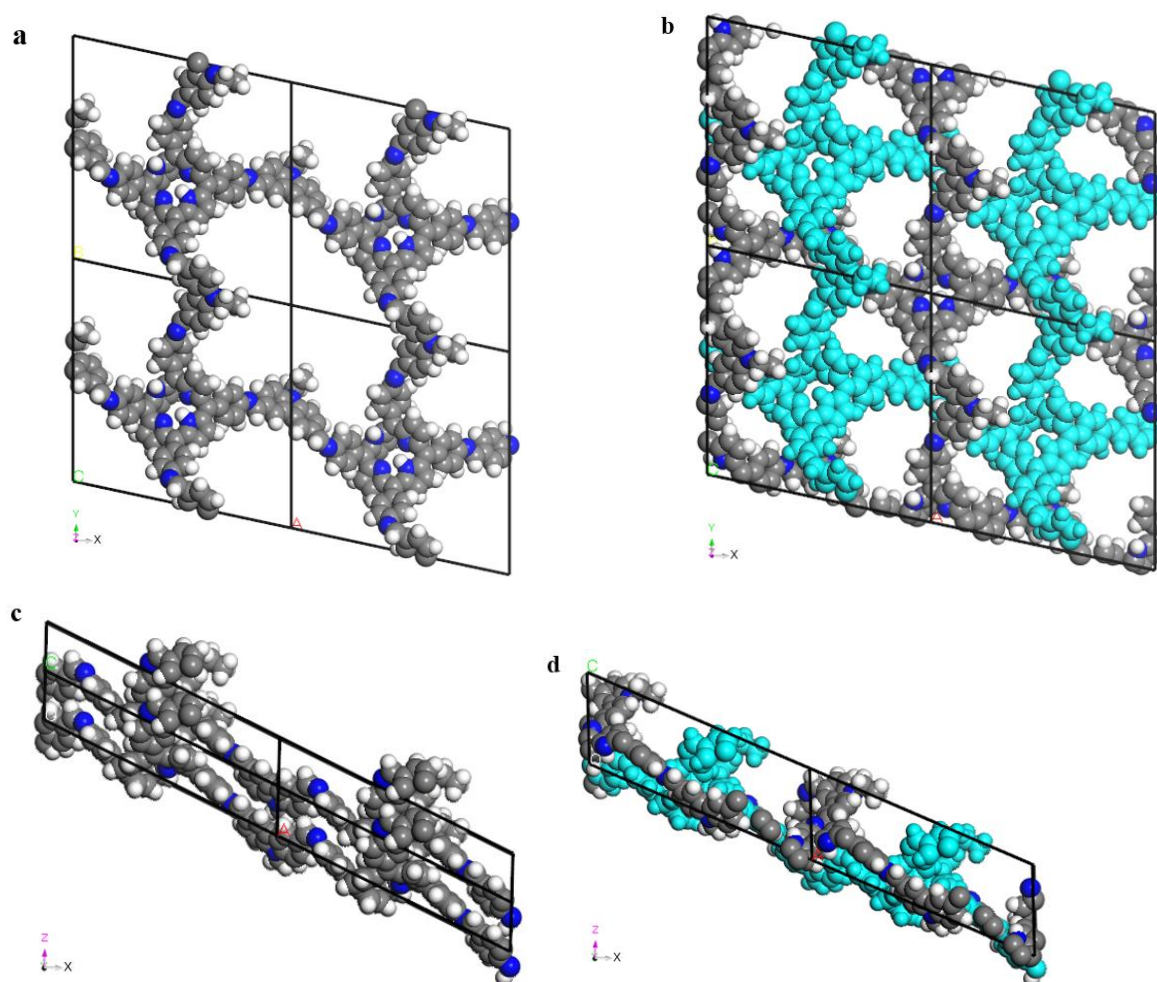

Figure S5. (a) Top view of the simulated two-dimensional AA-eclipsed model structure (b) Top view of the simulated two-dimensional AB-staggered model structure of COF-K (c) Side view of the simulated two-dimensional AA-eclipsed model structure of COF-K (d) Side view of the simulated two-dimensional AB-staggered model structure of COF-K.

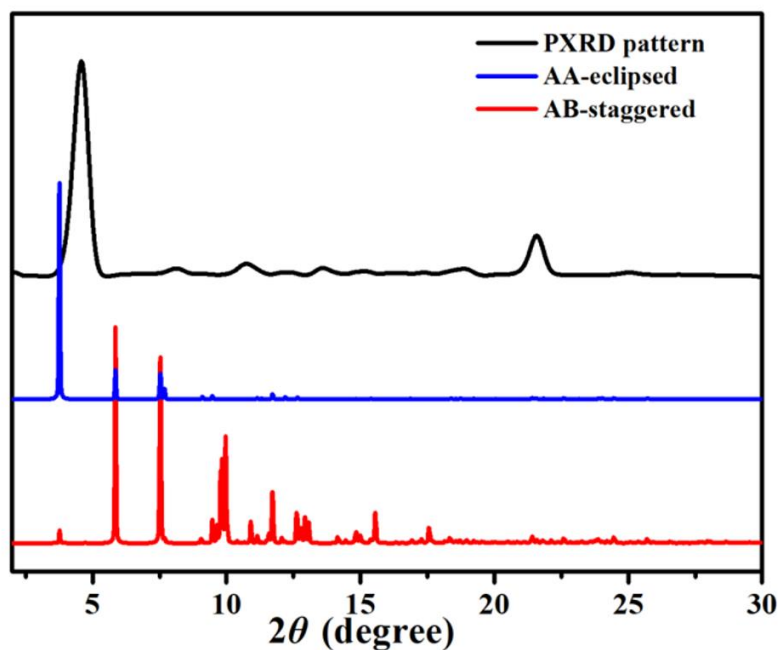

Figure S6. Experimental PXRD pattern (black curve) and the simulated patterns according to two-dimensional AA-eclipsed (red curve) and AB-staggered (blue curve) stacking models.

## Section S6 CO<sub>2</sub> adsorption measurement

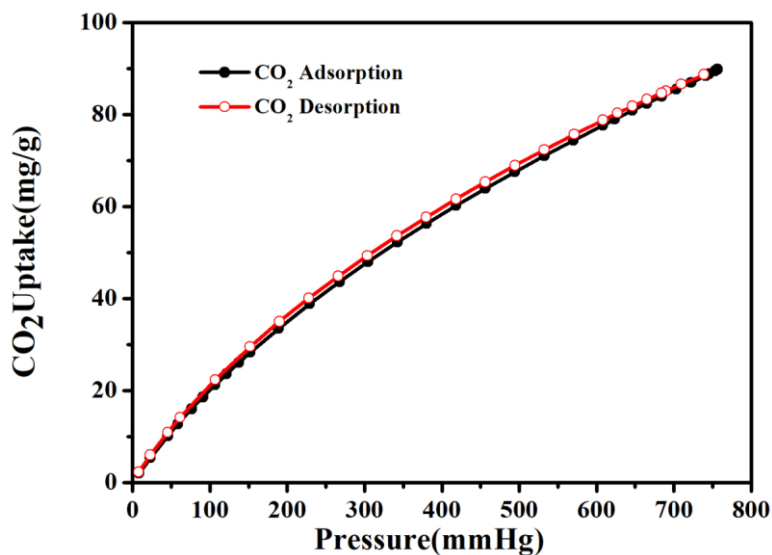

Figure S7. CO<sub>2</sub> adsorption-desorption isotherm of COF-K at 273K.

## Section S7 Unit cell parameters

| COF-K                                                                    |         |         |          |
|--------------------------------------------------------------------------|---------|---------|----------|
| Triclinic P1                                                             |         |         |          |
| a=21.6185 Å, b=22.7637 Å, c=4.1495 Å                                     |         |         |          |
| $\alpha = 86.0359^\circ, \beta = 88.8996^\circ, \gamma = 115.2113^\circ$ |         |         |          |
| C1                                                                       | 2.27928 | 0.52271 | -0.21954 |
| C2                                                                       | 2.32762 | 0.49819 | -0.12254 |
| N3                                                                       | 2.38869 | 0.55093 | -0.10051 |
| C4                                                                       | 2.38112 | 0.60725 | -0.15942 |
| C5                                                                       | 2.31178 | 0.58914 | -0.23938 |
| C6                                                                       | 2.31495 | 0.43285 | -0.04307 |
| C7                                                                       | 2.35147 | 0.34626 | 0.1632   |
| C8                                                                       | 2.41193 | 0.34227 | 0.17837  |
| C9                                                                       | 2.46339 | 0.40492 | 0.03422  |
| N10                                                                      | 2.43497 | 0.4469  | -0.04752 |
| C11                                                                      | 2.36651 | 0.41151 | 0.01754  |
| C12                                                                      | 2.53278 | 0.41813 | -0.02376 |
| C13                                                                      | 2.58412 | 0.48088 | -0.12084 |
| C14                                                                      | 2.65319 | 0.4986  | -0.23509 |
| C15                                                                      | 2.68557 | 0.56495 | -0.29066 |
| C16                                                                      | 2.63756 | 0.58989 | -0.20594 |
| N17                                                                      | 2.57667 | 0.53737 | -0.11612 |
| C18                                                                      | 2.65036 | 0.65542 | -0.19285 |
| C19                                                                      | 2.50197 | 0.68337 | -0.10451 |
| N20                                                                      | 2.53022 | 0.64127 | -0.15638 |
| C21                                                                      | 2.59872 | 0.67665 | -0.13865 |
| C22                                                                      | 2.61393 | 0.74191 | -0.05358 |
| C23                                                                      | 2.5536  | 0.74608 | -0.02758 |
| C24                                                                      | 2.43256 | 0.67017 | -0.13387 |
| C25                                                                      | 2.24343 | 0.38439 | -0.01425 |
| C26                                                                      | 2.41249 | 0.72398 | -0.13668 |
| C27                                                                      | 2.55275 | 0.36423 | 0.01728  |
| C28                                                                      | 2.72183 | 0.70412 | -0.22648 |
| C29                                                                      | 2.35317 | 0.71756 | 0.05529  |
| C30                                                                      | 2.3343  | 0.76824 | 0.05977  |
| C31                                                                      | 2.37471 | 0.82867 | -0.12811 |
| C32                                                                      | 2.43447 | 0.83589 | -0.31673 |
| C33                                                                      | 2.45225 | 0.78461 | -0.32526 |

|     |         |         |          |
|-----|---------|---------|----------|
| C34 | 2.7408  | 0.76392 | -0.43188 |
| C35 | 2.80751 | 0.8107  | -0.46686 |
| C36 | 2.85955 | 0.79997 | -0.29629 |
| C37 | 2.84136 | 0.74027 | -0.09395 |
| C38 | 2.77429 | 0.69384 | -0.05791 |
| C39 | 2.61224 | 0.37072 | 0.19048  |
| C40 | 2.63095 | 0.31997 | 0.23709  |
| C41 | 2.59048 | 0.25942 | 0.11143  |
| C42 | 2.53072 | 0.25226 | -0.05864 |
| C43 | 2.51282 | 0.30349 | -0.10829 |
| C44 | 2.22397 | 0.32447 | -0.16242 |
| C45 | 2.15723 | 0.27785 | -0.13917 |
| C46 | 2.10567 | 0.28899 | 0.03515  |
| C47 | 2.12431 | 0.34894 | 0.17948  |
| C48 | 2.19148 | 0.39519 | 0.15792  |
| N49 | 2.92797 | 0.8433  | -0.31922 |
| C50 | 2.94871 | 0.90249 | -0.4524  |
| C51 | 3.02023 | 0.94718 | -0.48716 |
| C52 | 3.03978 | 1.01093 | -0.64405 |
| C53 | 3.10749 | 1.05615 | -0.67677 |
| C54 | 3.15627 | 1.0362  | -0.54922 |
| C55 | 3.13786 | 0.9713  | -0.40338 |
| C56 | 3.06982 | 0.92739 | -0.36857 |
| C57 | 3.20066 | 0.96651 | -0.3314  |
| C58 | 3.25402 | 1.02893 | -0.42554 |
| N59 | 3.22617 | 1.07051 | -0.54646 |
| C60 | 3.32259 | 1.04104 | -0.40733 |
| C61 | 3.33729 | 0.98917 | -0.30865 |
| C62 | 3.28517 | 0.92595 | -0.2286  |
| C63 | 3.21674 | 0.91514 | -0.23109 |
| C64 | 3.26511 | 1.13731 | -0.68486 |
| C65 | 3.23835 | 1.18342 | -0.53883 |
| C66 | 3.30245 | 0.87136 | -0.18884 |
| N67 | 3.04145 | 0.24187 | -0.01844 |
| C68 | 3.02089 | 0.18312 | -0.10319 |
| C69 | 2.94957 | 0.13826 | -0.09226 |
| C70 | 2.9312  | 0.07629 | -0.21439 |
| C71 | 2.86368 | 0.03136 | -0.21584 |
| C72 | 2.81415 | 0.05005 | -0.09247 |
| C73 | 2.83131 | 0.11282 | 0.02461  |
| C74 | 2.89924 | 0.15653 | 0.02743  |
| C75 | 2.76763 | 0.11661 | 0.09701  |



|      |         |          |          |
|------|---------|----------|----------|
| C76  | 2.71508 | 0.05594  | 0.02527  |
| N77  | 2.74416 | 0.01595  | -0.07642 |
| C78  | 2.64639 | 0.0441   | 0.04365  |
| C79  | 2.63099 | 0.09487  | 0.11789  |
| C80  | 2.68239 | 0.15644  | 0.17869  |
| C81  | 2.75065 | 0.16652  | 0.17934  |
| C82  | 2.66543 | 0.21105  | 0.19206  |
| N83  | 2.60501 | 0.20583  | 0.13622  |
| C84  | 2.70878 | -0.0475  | -0.2052  |
| C85  | 2.7264  | -0.09909 | -0.01162 |
| N86  | 1.3557  | 0.88593  | -0.05653 |
| H87  | 2.22578 | 0.49272  | -0.26539 |
| H88  | 2.43517 | 0.54933  | -0.06381 |
| H89  | 2.28953 | 0.62321  | -0.30154 |
| H90  | 2.30092 | 0.30832  | 0.24441  |
| H91  | 2.42094 | 0.30068  | 0.28018  |
| H92  | 2.67536 | 0.46435  | -0.26764 |
| H93  | 2.73877 | 0.5946   | -0.38101 |
| H94  | 2.5303  | 0.53912  | -0.06994 |
| H95  | 2.66449 | 0.77959  | -0.01512 |
| H96  | 2.54476 | 0.78767  | 0.04195  |
| H97  | 2.32313 | 0.67168  | 0.21833  |
| H98  | 2.28976 | 0.76246  | 0.23025  |
| H99  | 2.46479 | 0.88285  | -0.47022 |
| H100 | 2.49709 | 0.78996  | -0.49061 |
| H101 | 2.701   | 0.77163  | -0.57803 |
| H102 | 2.82006 | 0.85485  | -0.64863 |
| H103 | 2.88203 | 0.73273  | 0.04485  |
| H104 | 2.76093 | 0.64884  | 0.11659  |
| H105 | 2.64261 | 0.4169   | 0.3038   |
| H106 | 2.67592 | 0.32638  | 0.39103  |
| H107 | 2.50051 | 0.20522  | -0.1646  |
| H108 | 2.46776 | 0.29791  | -0.2585  |
| H109 | 2.26337 | 0.31661  | -0.31292 |
| H110 | 2.14426 | 0.23347  | -0.27825 |
| H111 | 2.08399 | 0.35692  | 0.32056  |
| H112 | 2.20536 | 0.44057  | 0.28725  |
| H113 | 2.91299 | 0.92333  | -0.54682 |
| H114 | 2.99991 | 1.0246   | -0.74627 |
| H115 | 3.12168 | 1.10551  | -0.80226 |
| H116 | 3.05253 | 0.87707  | -0.25115 |
| H117 | 3.36396 | 1.08926  | -0.48556 |



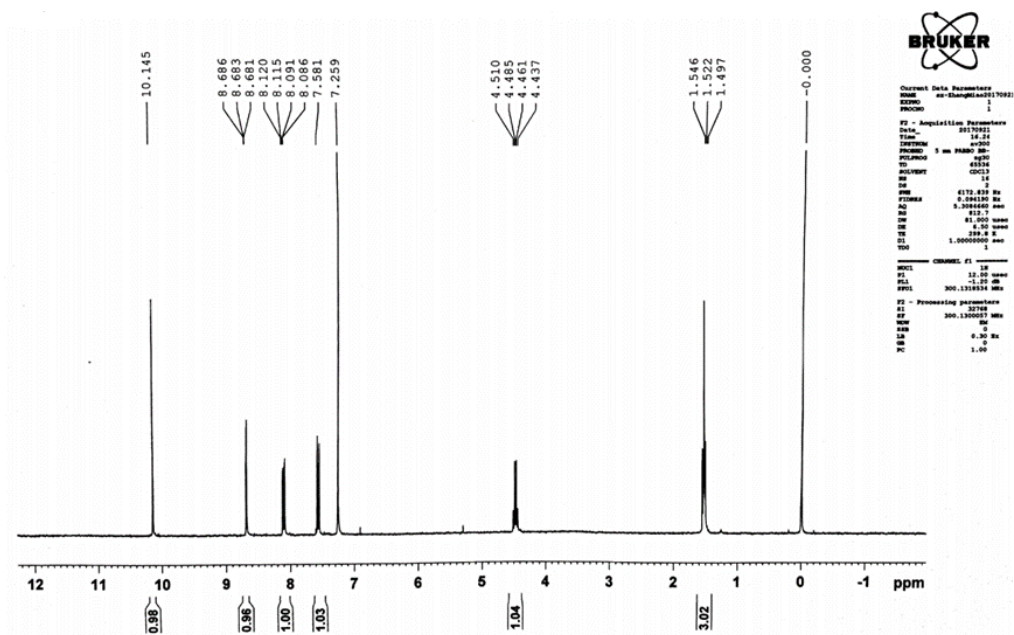

Figure S9.  $^1\text{H}$  NMR spectrum of 3,6-diformyl-9-ethylcarbazole
